# Supplementary material for: DEPDC1 as a metabolic target regulates glycolysis in renal cell carcinoma through AKT/mTOR/HIF1α pathway
Source: PubMed Central journal article supplement (PMC11283501; doi:10.1038/s41419-024-06913-1), 2024-07-27
Supplement: 41419_2024_6913_MOESM15_ESM.pdf [file 41419_2024_6913_MOESM15_ESM.pdf]

**Figure 3b**

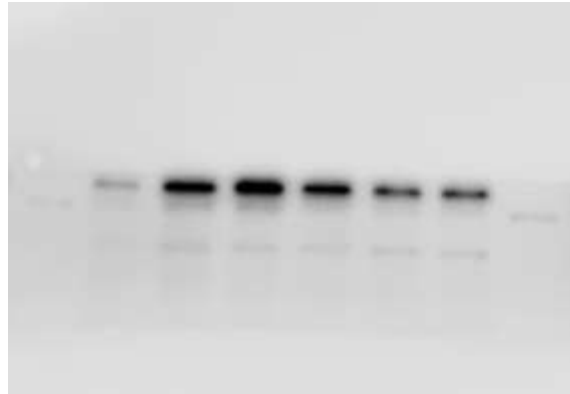

**DEPDC1 93kDa**

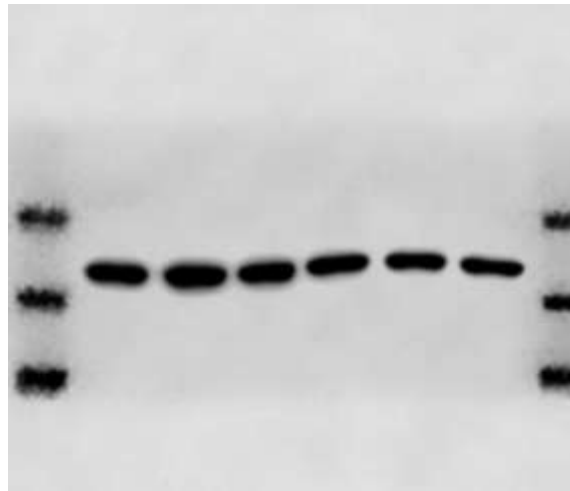

**$\beta$ -actin 42kDa**

**Figure 3c**

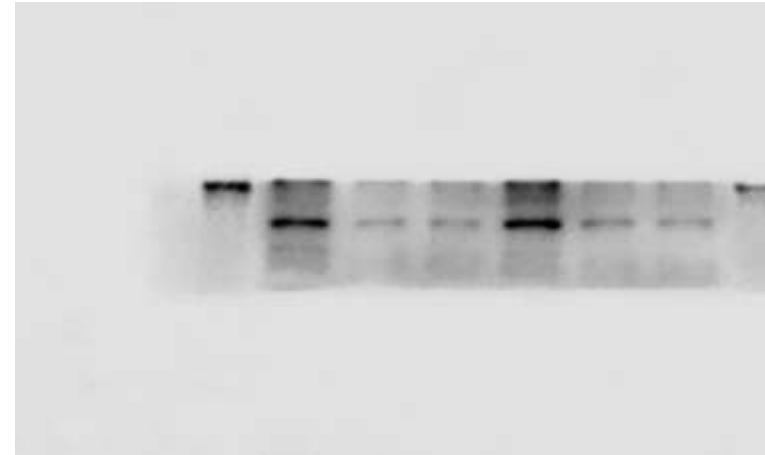

**DEPDC1 93kDa**

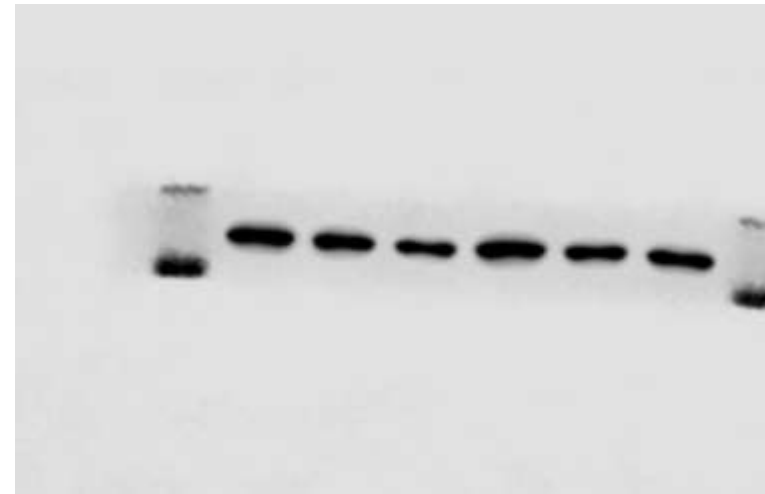

**$\beta$ -actin 42kDa**

**Figure 3d**

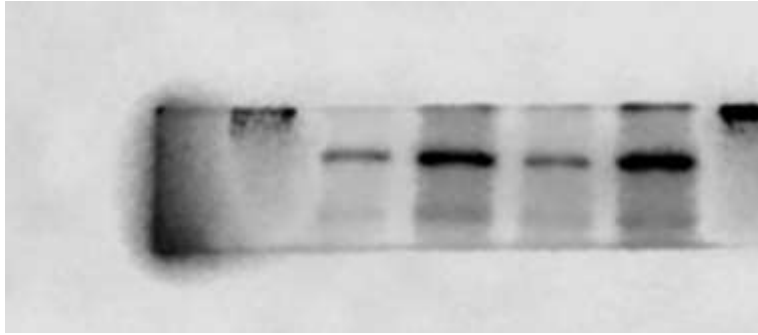

**DEPDC1 93kDa**

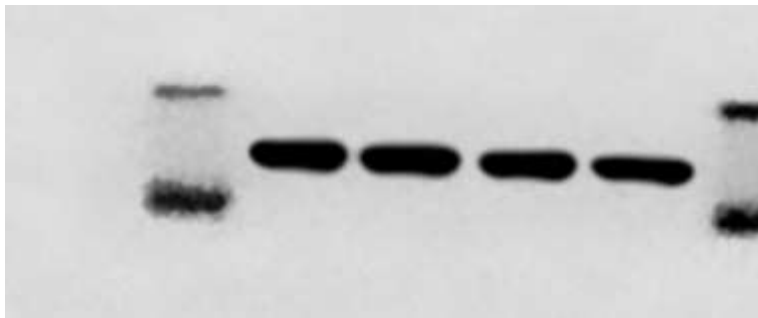

**$\beta$ -actin 42kDa**

**Figure 4b**

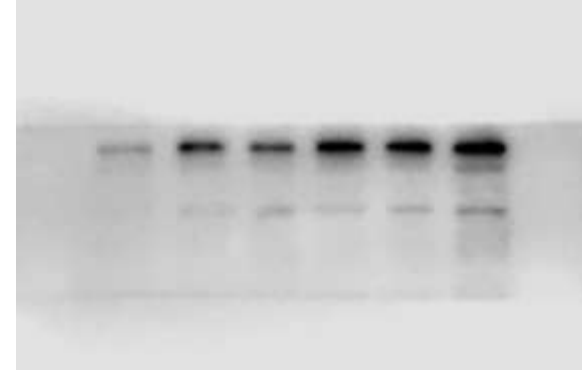

**DEPDC1 93kDa**

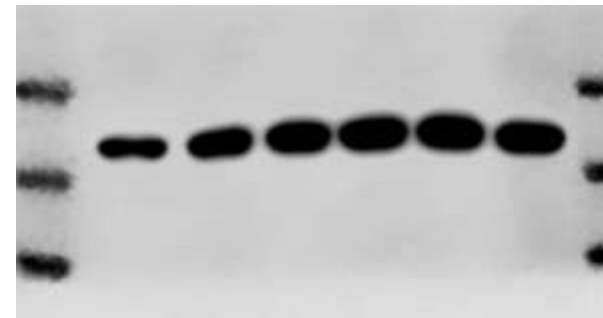

**$\beta$ -actin 42kDa**

**Figure 4c**

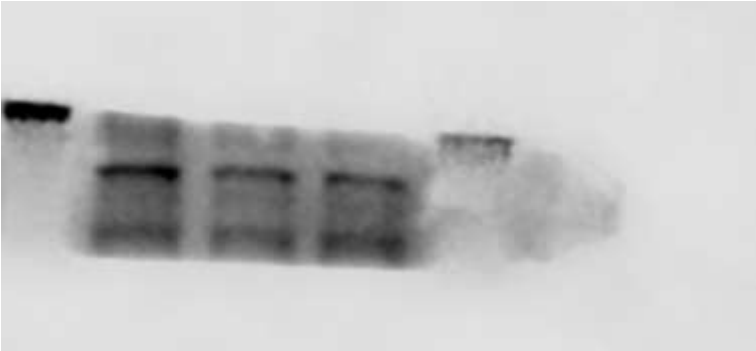

**DEPDC1 93kDa**

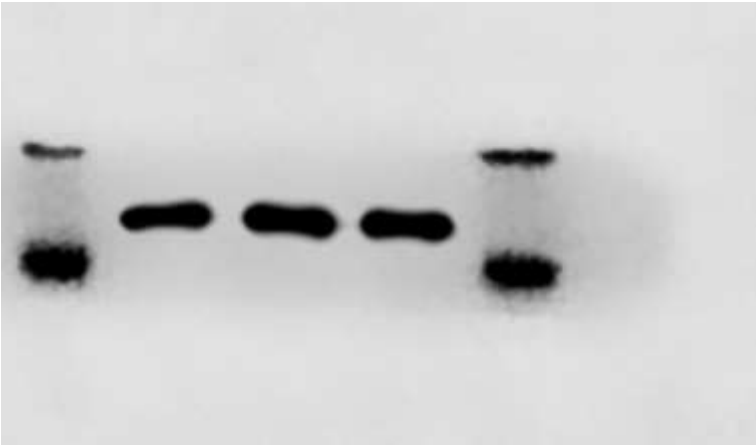

**β-actin 42kDa**

**Figure 4g**

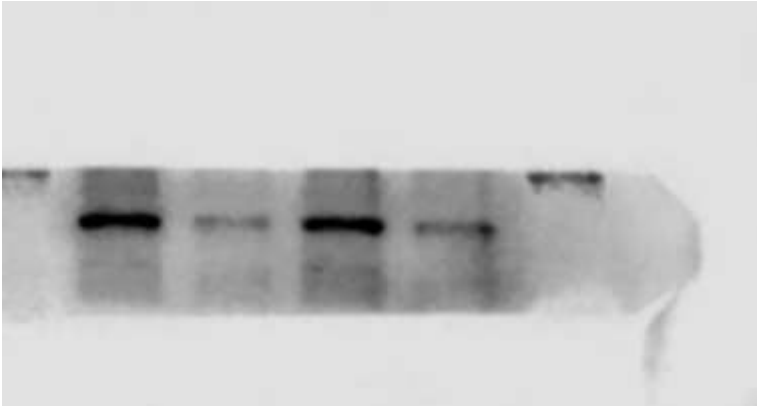

**DEPDC1 93kDa**

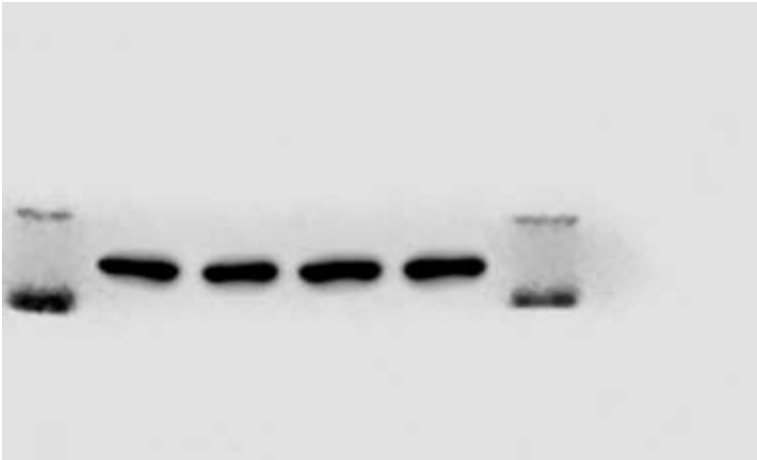

**β-actin 42kDa**

**Figure 4h**

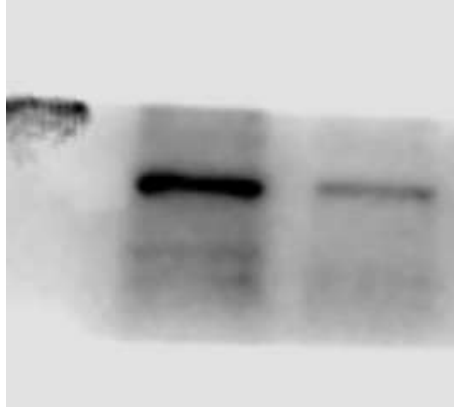

**DEPDC1 93kDa**

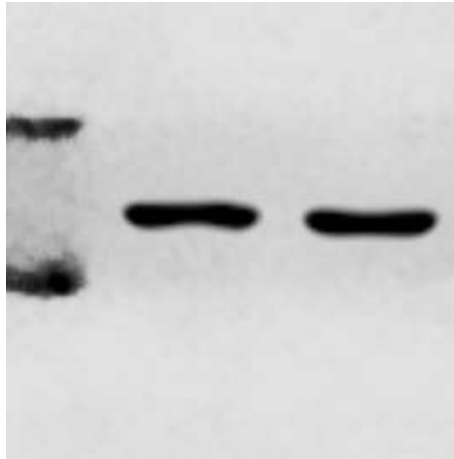

**$\beta$ -actin 42kDa**

**Figure 5i—OS-RC-2+786-O**

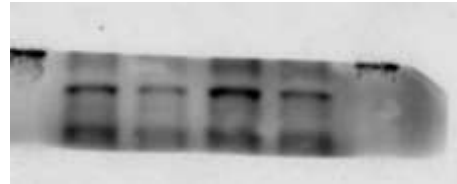

**DEPDC1 93kDa**

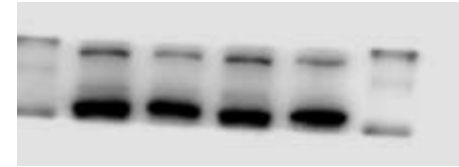

**HIF1α 120kDa**

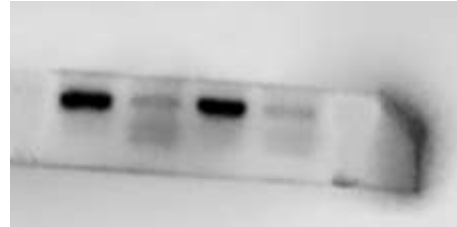

**p-AKT 60kDa**

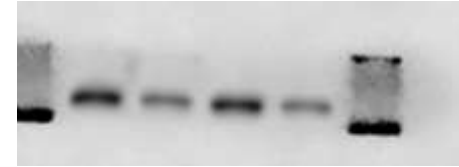

**HK2 102kDa**

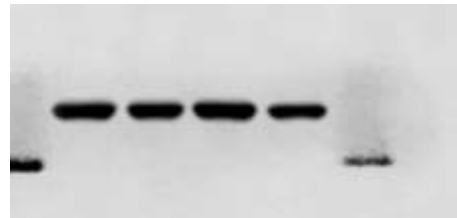

**AKT 60kDa**

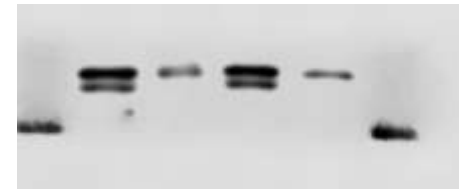

**PKM2 58kDa**

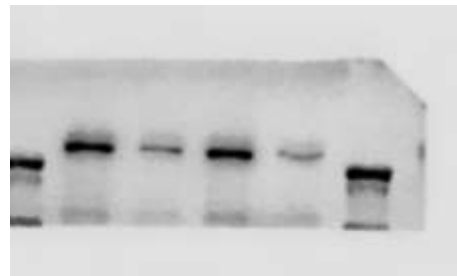

**p-mTOR 289kDa**

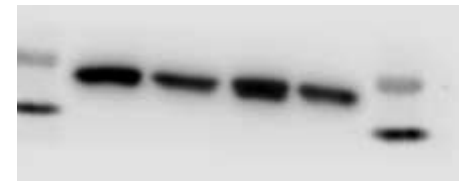

**LDHA 37kDa**

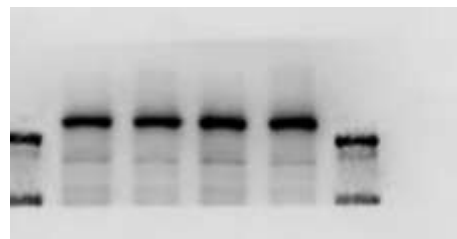

**mTOR 289kDa**

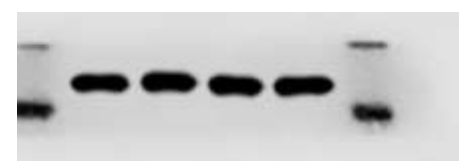

**β-actin 42kDa**

**Figure 5i—786-O-R**

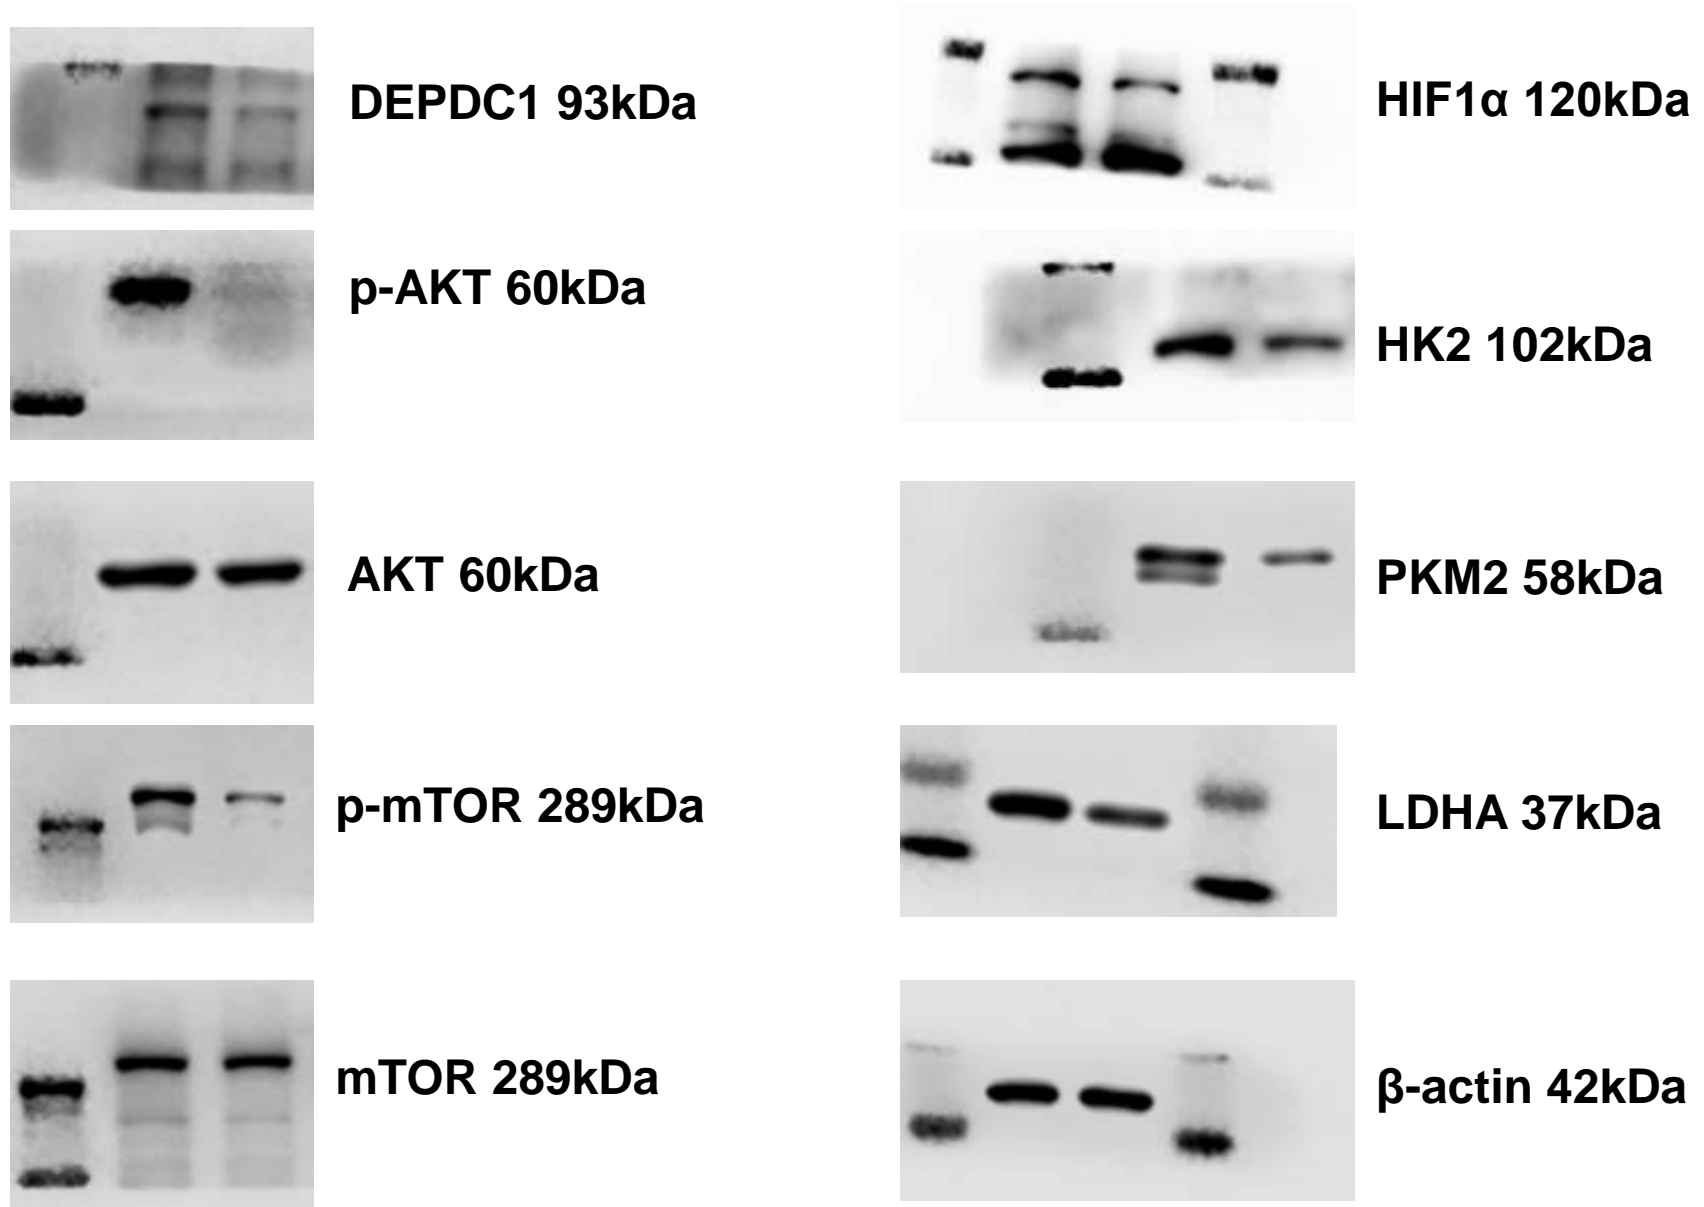

**Figure 5i—A498+ACHN**

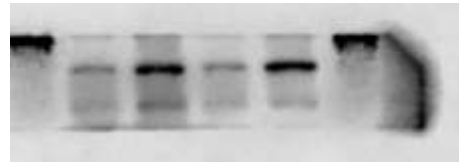

**DEPDC1 93kDa**

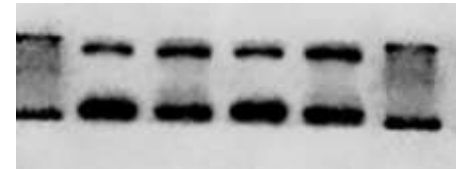

**HIF1α 120kDa**

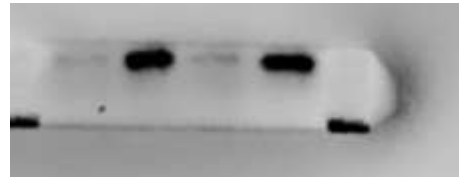

**p-AKT 60kDa**

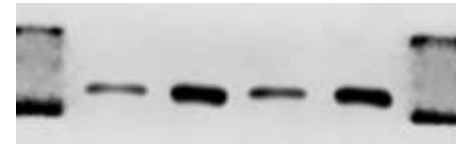

**HK2 102kDa**

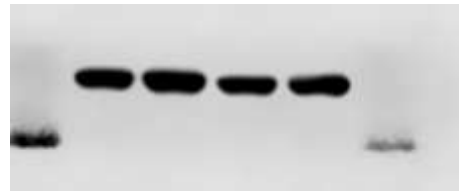

**AKT 60kDa**

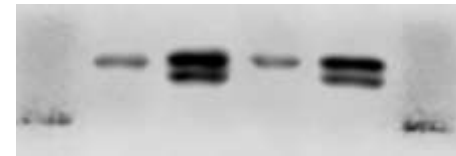

**PKM2 58kDa**

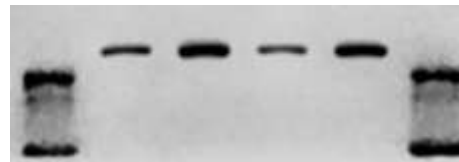

**p-mTOR 289kDa**

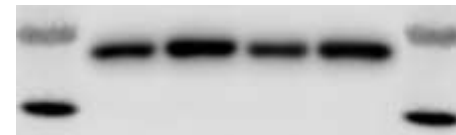

**LDHA 37kDa**

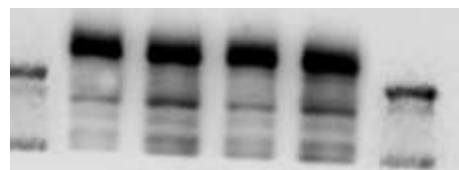

**mTOR 289kDa**

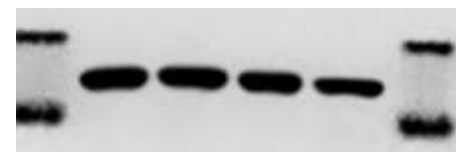

**β-actin 42kDa**
